# Supplementary material for: Deciphering Local Adaptation Of Native Indian Cattle (Bos Indicus) Breeds Using Landscape Genomics And In-Silico Prediction Of Deleterious SNP Effects On Protein Structure And Function
Source: Research Square preprint supplement (doi:10.21203/rs.3.rs-533895/v1), 2021-06-09
Supplement: Supplementary file 1 [file 3ff74b46acd5c9be7e747039.docx]

|  | **Leh** | | | **Jodhpur** | | |
| --- | --- | --- | --- | --- | --- | --- |
| **Month** | **TMIN** | **TMAX** | **MR** | **TMIN** | **TMAX** | **MR** |
| January | -2 | -14.4 | 9.5 | 25 | 9.6 | 10.2 |
| February | 1.5 | -11 | 8.1 | 27.8 | 11.8 | 4.8 |
| March | 6.5 | -5.9 | 11 | 33.4 | 17.2 | 3.9 |
| April | 12.3 | -1.1 | 9.1 | 38.4 | 22.7 | 5.1 |
| May | 16.2 | 3.2 | 9 | 41.4 | 26.8 | 66.1 |
| June | 21.8 | 7.4 | 3.5 | 40.1 | 28.2 | 35.1 |
| July | 25 | 10.5 | 15.2 | 36 | 26.8 | 120.8 |
| August | 25.3 | 10 | 15.4 | 33.7 | 25.3 | 128.9 |
| September | 21.7 | 5.8 | 9 | 35 | 24.1 | 57.6 |
| October | 14.6 | -1 | 7.5 | 36 | 19.9 | 8.1 |
| November | 7.9 | -6.7 | 3.6 | 31.5 | 14.5 | 2.6 |
| December | 2.3 | -11.8 | 4.6 | 26.8 | 10.8 | 1.6 |
|  |  | **Bangalore** | | **Gangtok** | | |
| **Month** | **TMIN** | **TMAX** | **MR** | **TMIN** | **TMAX** | **MR** |
| January | 27.4 | 15 | 4.9 | 12.6 | 4.2 | 31.9 |
| February | 30.1 | 16.6 | 7.9 | 14.1 | 5.5 | 79.4 |
| March | 32.8 | 19 | 10 | 18.3 | 8.7 | 122.2 |
| April | 33.9 | 21.3 | 43.9 | 21 | 11.5 | 270.9 |
| May | 33.1 | 21.1 | 111.9 | 21.7 | 13.6 | 527.7 |
| June | 29.4 | 19.8 | 79.7 | 22.2 | 16 | 611.3 |
| July | 27.7 | 19.3 | 109.7 | 22 | 16.6 | 628.6 |
| August | 27.6 | 19.2 | 138.8 | 22.4 | 16.5 | 563.2 |
| September | 28.1 | 19.1 | 185.9 | 21.8 | 15.5 | 463.4 |
| October | 27.9 | 18.9 | 161.7 | 20.9 | 12.3 | 177.9 |
| November | 26.8 | 17.2 | 59.2 | 17.8 | 8.7 | 41.7 |
| December | 26.2 | 15.4 | 17.4 | 14.4 | 5.6 | 21.1 |

**Table S2**. The monthly average climatic data obtained from India Meteorological Department for four sampling locations (Leh, Jodhpur, Bangalore and Gangtok)
