# Supplementary material for: Deciphering Local Adaptation Of Native Indian Cattle (Bos Indicus) Breeds Using Landscape Genomics And In-Silico Prediction Of Deleterious SNP Effects On Protein Structure And Function
Source: Research Square preprint supplement (doi:10.21203/rs.3.rs-533895/v1), 2021-06-09

**Figure S7 Ramachandran plots for Glycine and Proline residues of USP18 variants.**

1. Wild variant of USP18 protein.


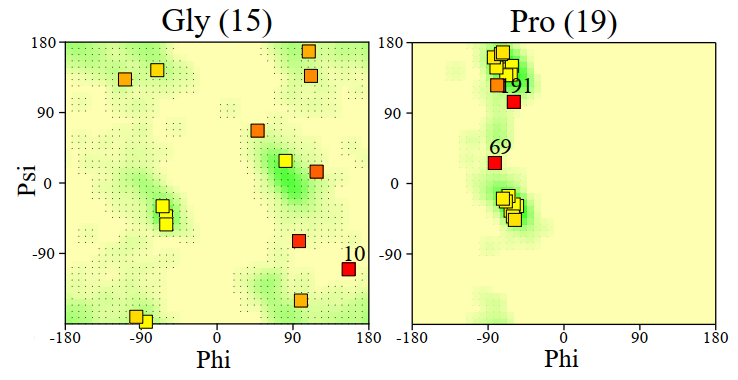


1. Mutant variant of USP18 protein.


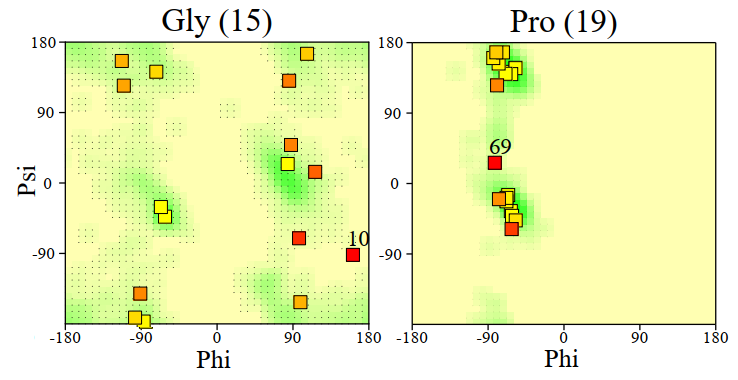

Supplement: Supplementary file 2 [file 4a4e24bcecc8361045a16b03.docx]
