# Supplementary material for: Deciphering Local Adaptation Of Native Indian Cattle (Bos Indicus) Breeds Using Landscape Genomics And In-Silico Prediction Of Deleterious SNP Effects On Protein Structure And Function
Source: Research Square preprint supplement (doi:10.21203/rs.3.rs-533895/v1), 2021-06-09
Supplement: Supplementary file 3 [file c3eaaf778facbbc356e98358.docx]

| **S. No.** | **rs_ID** | **Gene** | **Amino acid (AA) location** | **AA variation** |
| --- | --- | --- | --- | --- |
| 1 | rs110634328 | TBRG4 | 433 | R/C |
| 2 | rs134086196 | APLF | 318 | T/M |
| 3 | rs137509678 | NLRP1 | 51 | T/I |
| 4 | rs110841741 | DAGLB | 329 | P/L |
| 5 | rs43713759 | CEP250 | 2104 | R/Q |
| 6 | rs109597764 | BLZF1 | 51 | S/N |
| 7 | rs110010690 | INSYN2B | 284 | N/S |
| 8 | rs110148245 | LY9 | 238 | Q/K |
| 9 | rs135602248 | LRRC66 | 464 | T/M |
| 10 | rs110107082 | ODF3L1 | 101 | V/A |
| 11 | rs110148245 | LY9 | 238 | Q/K |
| 12 | rs136224280 | KMT2D | 2917 | M/I |
| 13 | rs110496333 | TAAR9 | 47 | V/M |
| 14 | rs133837832 | APOBEC4 | 325 | V/I |
| 15 | rs41833710 | FER1L6 | 1063 | D/G |
| 16 | rs133989977 | MUC4 | 982 | M/V |
| 17 | rs109176342 | SEC14L5 | 606 | R/Q |
| 18 | rs137040174 | KLK8 | 120 | M/V |
| 19 | rs134264649 | CLDN15 | 148 | D/N |
| 20 | rs109756935 | CMTM5 | 53 | M/T |
| 21 | rs110748921 | FRAS1 | 3801 | V/I |
| 22 | rs43391443 | ATXN7L1 | 156 | N/S |
| 23 | rs133420384 | BPIFB5 | 339 | V/A |
| 24 | rs134223409 | STRA6 | 289 | Q/R |
| 25 | rs137783511 | VPS13B | 3137 | I/V |
| 26 | rs134151223 | CD84 | 321 | I/V |
| 27 | rs136929311 | CEP250 | 730 | V/I |
| 28 | rs134416878 | CCDC14 | 745 | I/V |
| 29 | rs17870802 | ADGRB3 | 576 | G/S |
| 30 | rs136845821 | NPHP4 | 897 | Q/P |
| 31 | rs109571229 | FAM205C | 220 | P/L |
| 32 | rs133223391 | R3HCC1 | 307 | E/G |
| 33 | rs136889096 | SPOCK2 | 135 | V/I |
| 34 | rs43512788 | CDHR2 | 67 | S/P |
| 35 | rs41595440 | HMGXB3 | 270 | R/K |
| 36 | rs42882771 | EPC1 | 619 | M/V |
| 37 | rs136883553 | SASS6 | 677 | L/P |
| 38 | rs133531920 | ZKSCAN4 | 233 | T/A |
| 39 | rs41639856 | HPD | 155 | R/Q |
| 40 | rs109270062 | OR10P1 | 299 | R/K |
| 41 | rs134923946 | THYN1 | 144 | Y/H |
| 42 | rs134053875 | RFT1 | 537 | A/T |
| 43 | rs137836558 | SETBP1 | 375 | S/N |
| 44 | rs133314882 | VPS13C | 671 | T/A |
| 45 | rs135843326 | NME6 | 61 | R/Q |
| 46 | rs43287099 | MYO7B | 878 | R/Q |
| 47 | rs133547746 | VTN | 126 | S/P |
| 48 | rs110868896 | CCDC113 | 326 | W/R |
| 49 | rs133030087 | NUDT17 | 246 | T/A |
| 50 | rs41842834 | MED13L | 615 | A/T |
| 51 | rs133930504 | KIAA0232 | 439 | G/S |
| 52 | rs43646748 | TMED8 | 136 | I/V |
| 53 | rs108987541 | GPR162 | 354 | E/G |
| 54 | rs109818145 | PTPRK | 481 | I/V |
| 55 | rs110302119 | FSIP2 | 2652 | I/V |
| 56 | rs110999848 | PPARGC1B | 114 | L/F |
| 57 | rs132659643 | HCN3 | 567 | S/G |
| 58 | rs132842739 | VWA5A | 255 | G/S |
| 59 | rs133067045 | IQCD | 120 | D/E |
| 60 | rs133094201 | CCDC14 | 899 | N/D |
| 61 | rs133423141 | HPS3 | 422 | A/D |
| 62 | rs134329557 | GBP5 | 325 | L/S |
| 63 | rs134932738 | CMYA5 | 1394 | Q/P |
| 64 | rs135008342 | RBM34 | 76 | E/K |
| 65 | rs136467370 | CMYA5 | 392 | T/A |
| 66 | rs136719806 | OR4K15 | 139 | H/R |
| 67 | rs137001154 | CMYA5 | 881 | V/A |
| 68 | rs137510285 | HPS3 | 518 | V/I |
| 69 | rs137798008 | ZNF277 | 213 | I/V |
| 70 | rs41255934 | PMF1 | 14 | A/E |
| 71 | rs41632689 | ACAD8 | 108 | I/V |
| 72 | rs41910871 | RSAD1 | 387 | N/S |

**Table S7. List of non-synonymous SNPs and the genes harboring them showing tolerant mutations with high confidence.**
