# Supplementary material for: Deciphering Local Adaptation Of Native Indian Cattle (Bos Indicus) Breeds Using Landscape Genomics And In-Silico Prediction Of Deleterious SNP Effects On Protein Structure And Function
Source: Research Square preprint supplement (doi:10.21203/rs.3.rs-533895/v1), 2021-06-09
Supplement: Supplementary file 5 [file edf487d47cd2877a26ee0de4.docx]

|  | **CRYBA1** | **USP18** |
| --- | --- | --- |
| **Best template** | 3LWK | 5CHT |
| **Encodes for** | Crystal structure of human Beta-crystallin A4 | Crystal structure of USP18 (mouse) |
| **Secondary Structure** | W: 0% H, 32% S, 67% L  M: 0% H, 33% S, 65% L | W: 25% H, 24% S, 49% L  M: 25% H, 24% S, 50% L |
| **Solvent Accessibility** | W: 37% E, 33% M, 29% B  M: 32% E, 37% M, 30% B | W: 48% E, 28% M, 22% B  M: 49% E, 26% M, 24% B |

**Table S11. Details of the secondary structure parameters and Solvent accessibility of predicted tertiary protein structure of wild and mutant proteins of CRYBA1 and USP18 proteins.**

W: Wild, M: Mutant, H: Helix, S: Sheet, L: Loop, E: Exposed, M: Medium, B: Buried
