# Supplementary figures and images for: Deciphering Local Adaptation Of Native Indian Cattle (Bos Indicus) Breeds Using Landscape Genomics And In-Silico Prediction Of Deleterious SNP Effects On Protein Structure And Function
Source: Research Square preprint supplement (doi:10.21203/rs.3.rs-533895/v1), 2021-06-09

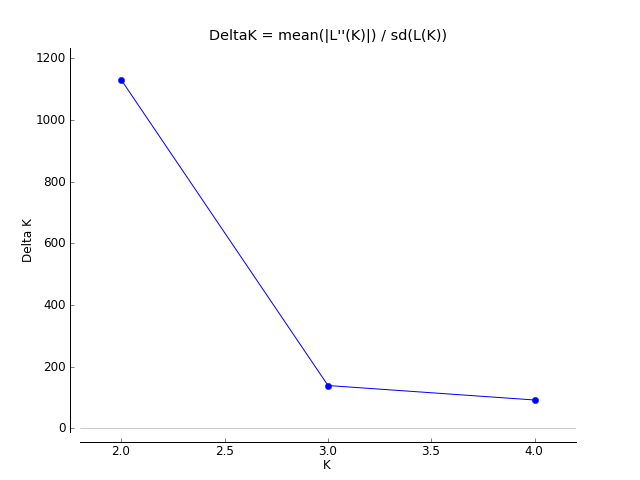


**Fig. S2**. Delta K vs K plot obtained from Structure Harvester

Supplement: Supplementary file 6 [file ee8ecd86bb351a63d6a516e5.docx]
